# Supplementary material
Source: Springer Nature journal article supplement (https://www.springermedizin.de/resource/supplementary/12906_2011_508_MOESM1_ESM.pdf/9519966)

% length of small intestine travelled by  
Charcoal meal

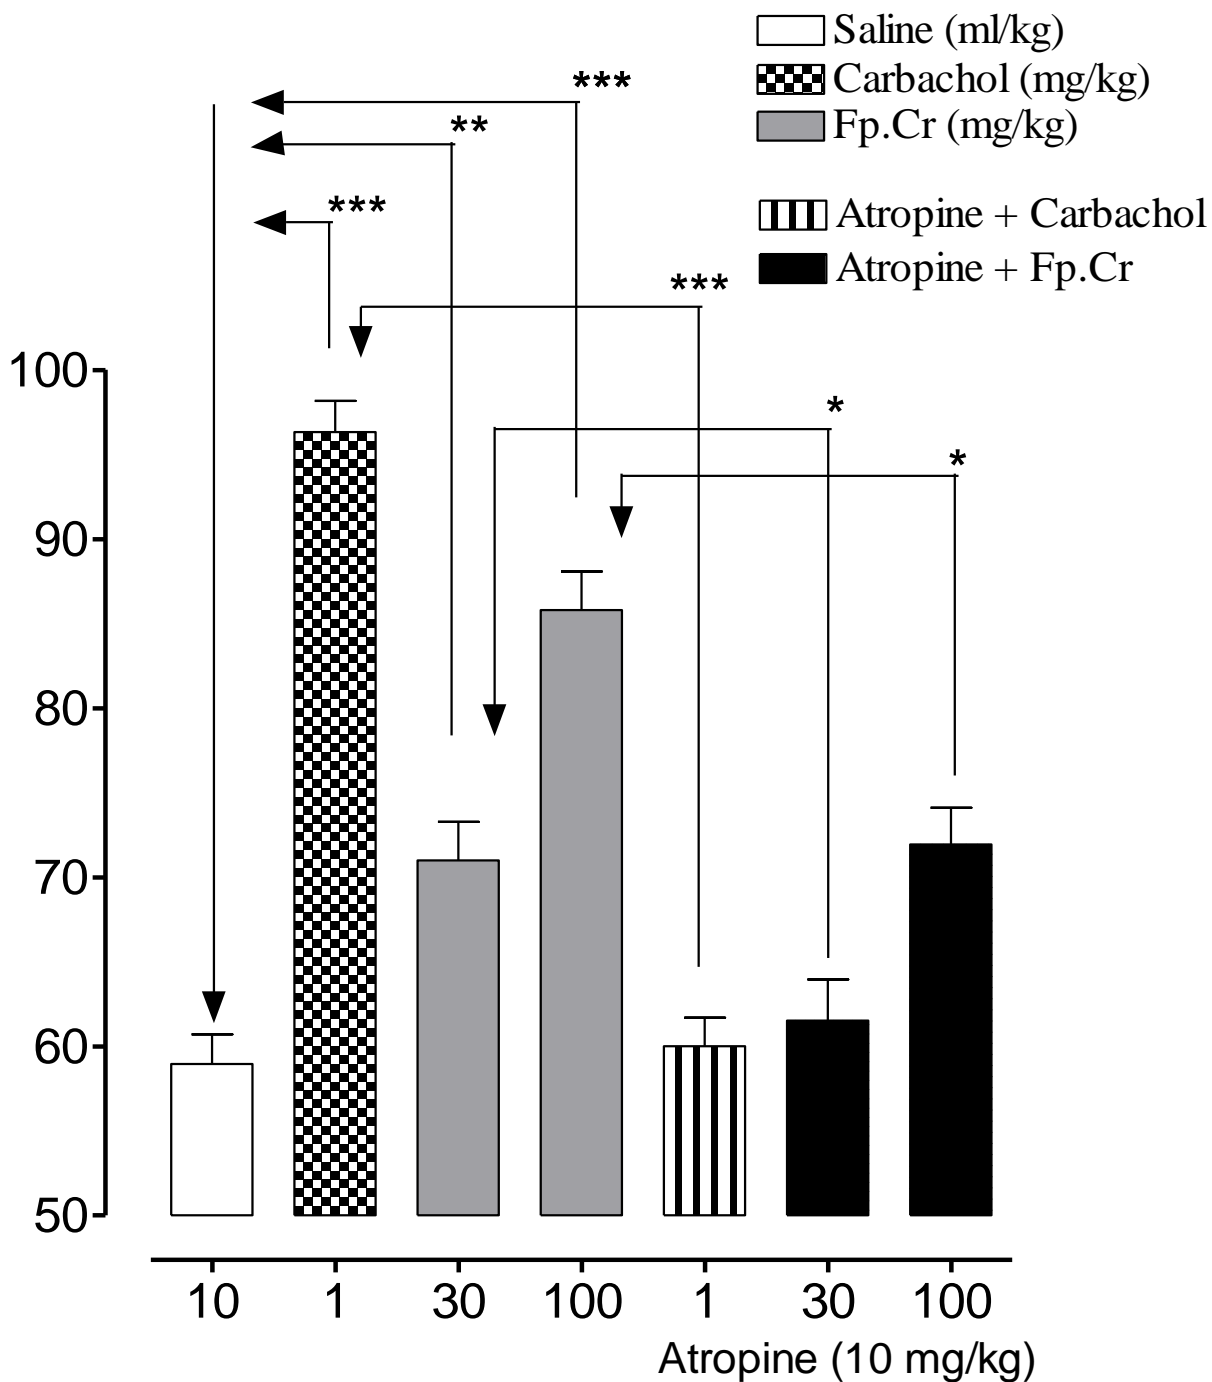

Supplement: MOESM1 [file 9519966]
